# Supplementary material for: Magnetic Nanoparticles Interact and Pass an In Vitro Co-Culture Blood-Placenta Barrier Model
Source: PubMed Central journal article supplement (PMC5853739; doi:10.3390/nano8020108), 2018-02-14
Supplement: nanomaterials-08-00108-s001.pdf [file nanomaterials-08-00108-s001.pdf]

# Magnetic nanoparticles interact and pass an *in vitro* co-culture blood-placenta barrier model

Elena K. Müller <sup>1§</sup>, Christine Gräfe <sup>1§</sup>, Frank Wiekhorst <sup>2</sup>, Christian Bergemann <sup>3</sup>, Andreas Weidner <sup>4</sup>, Silvio Dutz <sup>4</sup> and Joachim H. Clement <sup>1,\*</sup>

<sup>1</sup> Department Hematology and Oncology, Jena University Hospital, Am Klinikum 1, D-07747 Jena, Germany

<sup>2</sup> Physikalisch-Technische Bundesanstalt Berlin, Abbestr. 2-12, D-10587 Berlin, Germany

<sup>3</sup> chemicell GmbH, Eresburgstr. 22-23, D-12103 Berlin, Germany

<sup>4</sup> Institute of Biomedical Engineering and Informatics (BMTI), Technische Universität Ilmenau, Gustav-Kirchhoff-Strasse 2, D-98693 Ilmenau, Germany

\* Correspondence: joachim.clement@med.uni-jena.de; Tel.: ++49 3641 9325820

**Supplementary Materials:** The following are available online at [www.mdpi.com/link](http://www.mdpi.com/link), Figure S1: Schema for the timeline of preparation of the blood-placenta barrier model Figure S2: Comparison of expression of cell-cell contact markers  $\beta$ -catenin and ZO-1 for mono- and co-culture models, Figure S3: Cellular viability of BeWo cells and pericytes after short-term incubation with SPIONs. Table S1: Detailed characterization and properties of SPIONs, Table S2: Statistical analysis of data shown in figure 2(c), Table S3: Statistical analysis of data shown in figure 2(d), Table S4: Statistical analysis of data shown in figure 3(a), Table S5: Statistical analysis of data shown in figure 3(b).

**Table S1:** Detailed characterization and properties of SPIONs

| <b>fluidMAG-</b>                               |             |                                    |                                  |
|------------------------------------------------|-------------|------------------------------------|----------------------------------|
|                                                | <b>-D</b>   | <b>-PEI (750/O)</b>                | <b>-CMX</b>                      |
| <i>LOT</i>                                     | 0808/14     | 2710/14                            | 2006/15                          |
| <i>coating</i>                                 | starch      | polyethylenimine,<br>MW 750,000 Da | carboxymethyl-dextran,<br>sodium |
| <i>core</i>                                    | magnetite   | magnetite                          | maghemite                        |
| <i>SPION concentration<br/>(solid content)</i> | 25 µg/µl    | 25 µg/µl                           | 25 µg/µl                         |
| <i>Fe concentration by<br/>phenantroline</i>   | 10.83 µg/µl | 13.24 µg/µl                        | 12.17 µg/µl                      |
| <i>hydrodynamic diameter</i>                   | 150 nm      | 150 nm                             | 150 nm                           |
| <i>ζ potential</i>                             | -11 ± 7 mV  | 54 ± 12 mV                         | -24 ± 6 mV                       |

| <b>nanoscreenMAG/G- (ex/ em: 488 nm/ 588 nm)</b> |            |                                    |                                  |
|--------------------------------------------------|------------|------------------------------------|----------------------------------|
|                                                  | <b>-D</b>  | <b>-PEI (750/O)</b>                | <b>-CMX</b>                      |
| <i>sLOT</i>                                      | 2406/15    | 2506/15                            | 1906/15                          |
| <i>coating</i>                                   | starch     | polyethylenimine,<br>MW 750,000 Da | carboxymethyl-dextran,<br>sodium |
| <i>core</i>                                      | maghemite  | maghemite                          | maghemite                        |
| <i>SPION concentration<br/>(solid content)</i>   | 25 µg/µl   | 25 µg/µl                           | 25 µg/µl                         |
| <i>Fe concentration by<br/>phenantroline</i>     | n.d.       | n.d.                               | n.d.                             |
| <i>hydrodynamic diameter</i>                     | 150 nm     | 150 nm                             | 150 nm                           |
| <i>ζ potential</i>                               | -13 ± 9 mV | 56 ± 9 mV                          | -24 ± 6 mV                       |





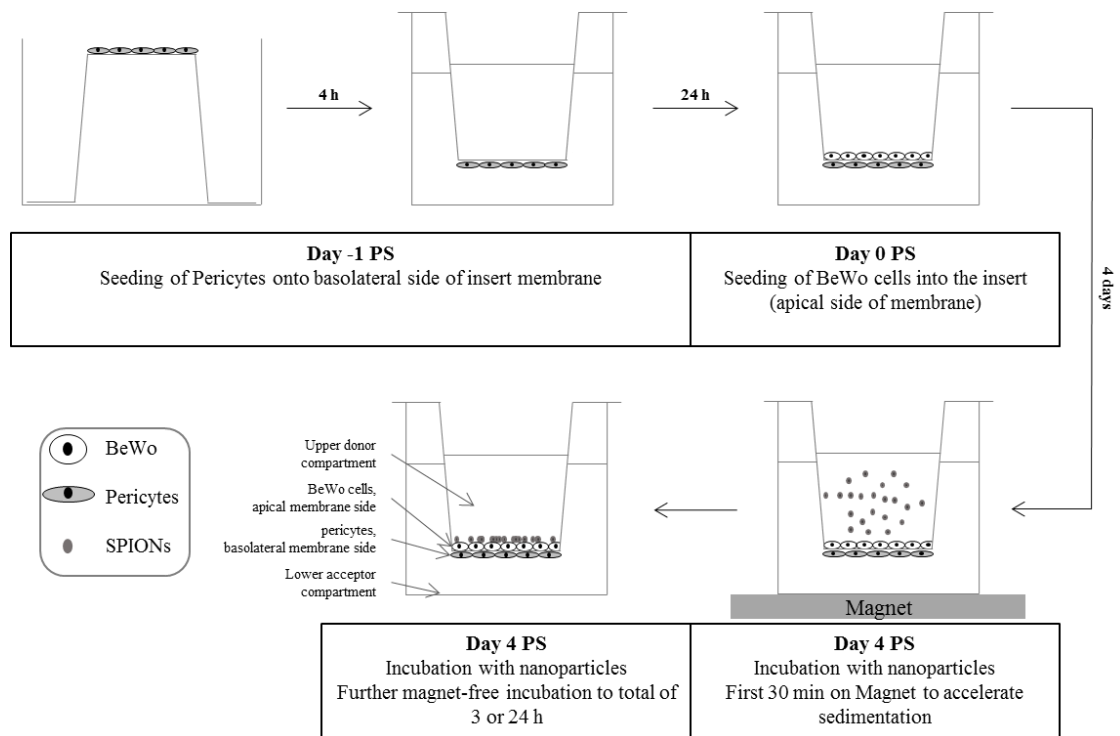

Figure S1: Schema for the timeline of preparation of the blood-placenta barrier model using a co-culture of BeWo cells and pericytes on transwell inserts, including the incubation with SPIONs. PS = post seeding.

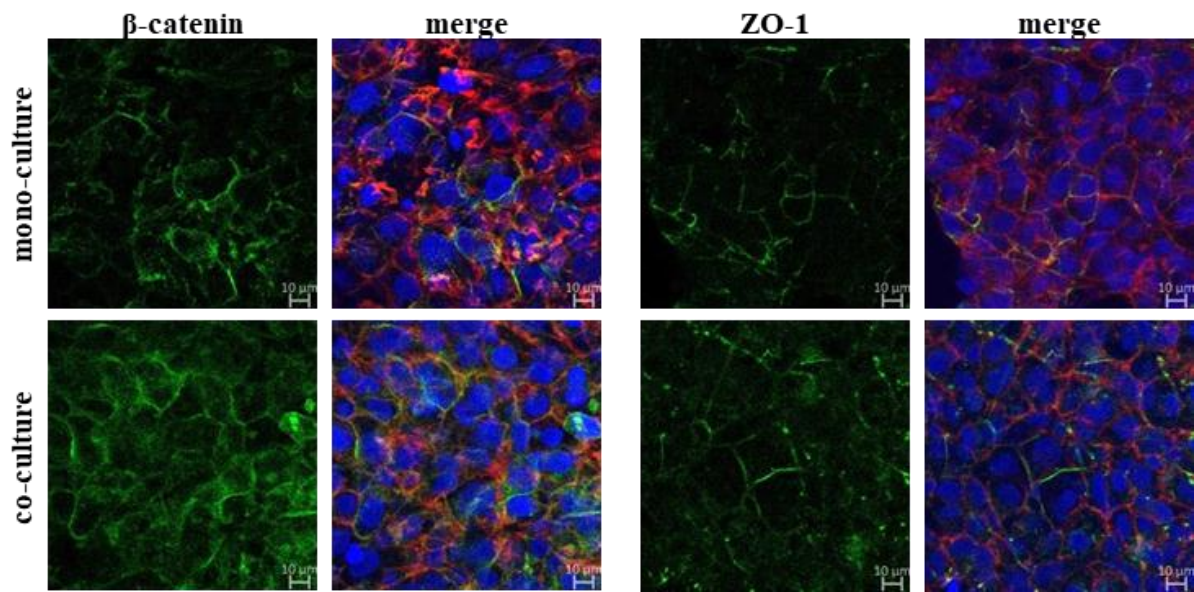

Figure S2: Comparison of expression of cell-cell contact markers  $\beta$ -catenin and ZO-1 for mono- and co-culture models. For the co-culture,  $1.1 \cdot 10^6$  pericytes  $\text{cm}^{-2}$  were seeded onto the basolateral site of 24-well membrane inserts and  $6.1 \cdot 10^5$  BeWo cells  $\text{cm}^{-2}$  were seeded on the apical site of the insert membrane after 24 h. For the mono-culture, only BeWo cells were used. On day four post seeding (PS), cells were fixed, permeabilized and stained with rabbit anti-ZO-1 or  $\beta$ -catenin primary antibody followed by AlexaFluor® 488-labeled goat anti-rabbit secondary antibody (green), Hoechst33258 (blue) and AlexaFluor®633 Phalloidin (red) to visualize cell-cell contacts, cell nuclei and cell cytoskeleton, respectively. Fluorescence signals were acquired by cLSM. Scale bar represents 10  $\mu\text{m}$ .

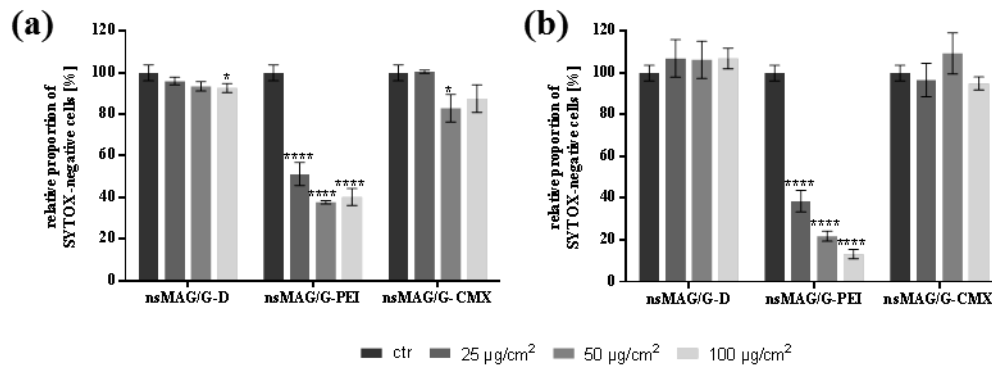

Figure S3: Cellular viability of BeWo cells (a) and pericytes (b) after short-term incubation with SPIONs.  $6.6 - 9.2 \cdot 10^4$  cells  $\text{cm}^{-2}$  were seeded into cell culture plates and incubated with 0, 25, 50 or 100  $\mu\text{g cm}^{-2}$  of nsMAG/G-D/PEI/CMX particles for 3 h after overnight cultivation. Afterwards cells were harvested, washed and stained with 2.5 nM SYTOX<sup>®</sup> red dead cell stain. Analysis of 10,000 events was performed using the FACS Calibur cytometer (BD Biosciences, San Jose, USA) and the obtained data were analyzed using the FlowJo<sup>™</sup> software (FlowJo, LLC, Ashland, USA). Shown is the relative proportion of SYTOX-negative cells [%] normalized to diluent-treated cells  $\pm$  standard deviation for three independent experiments. The significance of the results compared to respective control measurements without SPIONs was tested using two-way analysis of variance (ANOVA) following Tukey's multiple comparison test. Statistically significant differences are depicted as: \*  $p < 0.05$  and \*\*\*\*  $p < 0.0001$ .
